# Supplementary material for: Adsorption and reduction of hexavalent chromium on magnetic greigite (Fe3S4)-CTAB: leading role of Fe(ii) and S(−ii)
Source: Royal Society of Chemistry journal article supplement (doi:10.1039/c8ra06534a), 2018-01-01
Supplement: c8ra06534a1.pdf [file c8ra06534a1.pdf]

## Supporting Information

### Adsorption and reduction of hexavalent chromium on magnetic greigite (Fe<sub>3</sub>S<sub>4</sub>)-CTAB: Leading role of Fe(II) and S(-II)

Yanxia Zhou<sup>a</sup>, Yiting Zhao<sup>a</sup>, Xiaoge Wu<sup>a</sup>, Weiqin Yin<sup>a</sup>, Jianhua Hou<sup>a,b</sup>, Shengsen Wang<sup>a,b</sup>, Ke  
Feng<sup>a,b</sup>, Xiaozhi Wang<sup>a,b,c\*</sup>

<sup>a</sup>College of Environmental Science and Engineering, Yangzhou University,  
Jiangsu 225127, China.

<sup>b</sup>Jiangsu Collaborative Innovation Center for Solid Organic Waste Resource Utilization,  
Nanjing 210095, China.

<sup>c</sup>Institutes of Agricultural Science and Technology Development, Yangzhou University,  
Yangzhou 225127, Jiangsu, China

\*Corresponding Author. Tel.: +86 514 87979570. Fax: +86 514 87979528.

Email: xzwang@yzu.edu.cn.

## Text S1

### The pseudo first-order reaction model

The pseudo first-order reaction model can be expressed as Eq. S1:

$$\ln (C/C_0) = -k_1 t \quad (\text{S1})$$

$k_1$  is the rate constant of pseudo-first order kinetics ( $\text{min}^{-1}$ ), and  $t$  is the contact time (min).  $C$  ( $\text{mg}\cdot\text{L}^{-1}$ ) and  $C_0$  ( $\text{mg}\cdot\text{L}^{-1}$ ) are the concentration of Cr(VI) in aqueous solution at  $t$  min and 0 min, respectively.

### The pseudo first and second-order adsorption models

The pseudo first-order adsorption model can be expressed as Eq. S1:

$$\ln (q_e - q_t) = \ln q_e - k_1 t \quad (\text{S1})$$

$k_1$  is the equilibrium rate constant of pseudo-first order kinetics ( $\text{min}^{-1}$ ), and  $t$  is the contact time (min). The parameters  $q_t$  ( $\text{mg}\cdot\text{g}^{-1}$ ) and  $q_e$  ( $\text{mg}\cdot\text{g}^{-1}$ ) are the concentration of Cr(VI) adsorbed onto adsorbents at time  $t$  (min) or equilibrium time, which can be determined according to the mass balance equation:

$$q_t = (C_0 - C_t) \times V/m \quad (\text{S2})$$

$$q_e = (C_0 - C_e) \times V/m \quad (\text{S3})$$

where  $C_0$ ,  $C_t$  or  $C_e$  ( $\text{mg}\cdot\text{L}^{-1}$ ) are the initial concentrations, concentration at  $t$  min, and equilibrium concentration of Cr(VI) in the solution, respectively.  $V$  (L) is the total volume of the reaction solution, and  $m$  (g) is the weight of the adsorbent.

According to Eq. S1, values of  $\ln[(q_e - q_t)/q_e]$  should show a linear correlation with reaction time  $t$ , and the reaction rate constant  $k_1$  can be determined from the slope of the linear plot.

The linear form of the pseudo second-order adsorption model can be expressed as Eq. S4:

$$\frac{t}{q_t} = \frac{1}{k_2 q_e^2} + \frac{t}{q_e} \quad (\text{S4})$$

where  $k_2$  is the rate constant of the pseudo-second-order adsorption kinetics (g/mg/min).

### Langmuir and Freundlich Isotherm analysis

The Langmuir model can be expressed as Eq. S5:

$$\frac{1}{q_e} = \frac{1}{ab} \times \frac{1}{C_e} + \frac{1}{b} \quad (\text{S5})$$

$q_e$  and  $C_e$  correspond to the equilibrium concentration of Cr(VI) in the sorbent ( $\text{mg}\cdot\text{g}^{-1}$ ) and solution ( $\text{mg}\cdot\text{L}^{-1}$ ), respectively.  $b$  is the Langmuir constant related to maximum monolayer capacity,  $a$  is the Langmuir constant related to energy of adsorption.  $1/q_e$  versus  $1/C_e$  shows a linear relationship, and the rate constants can be calculated from the slope and intercept of their linear plot. In general, Langmuir isotherm is applied based on the hypothesis of monolayer adsorption on sorbents.

The Freundlich model can be expressed as Eq. S6:

$$q_e = K_F C_e^n \quad (\text{S6})$$

After modification, Eq. S6 can be transformed to Eq. S7 as follows:

$$\ln q_e = \ln K_F + \frac{1}{n} \ln C_e \quad (\text{S7})$$

where  $K_F$  is an unit capacity parameter related to the adsorption capacity, and  $n$  is a dimensionless parameter of surface intensity. Both of their value can be obtained by plotting the line with  $\ln q_e$  versus  $\ln C_e$ . The Freundlich isotherm is generally used to describe the heterogeneous adsorption on sorbents with uniform energy.

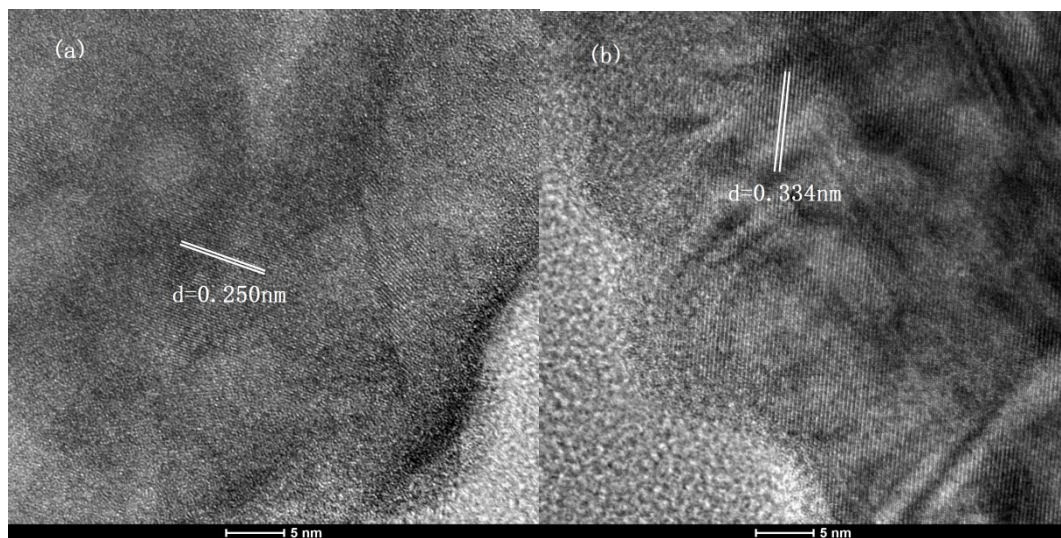

Figure S1. HRTEM images of Cr(VI)-treated  $\text{Fe}_3\text{S}_4\text{-CTAB}_{0.75}$

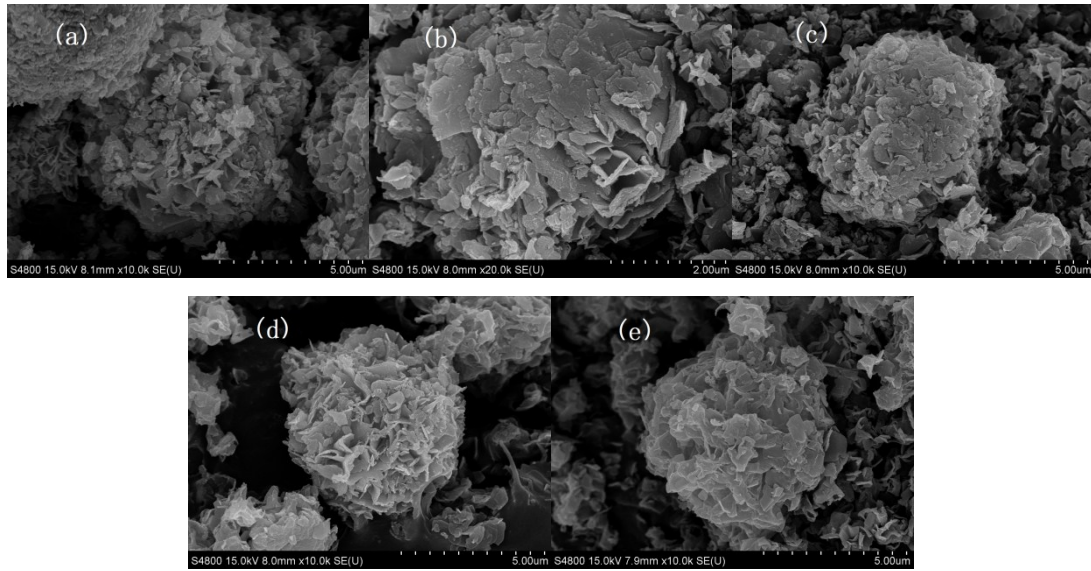

Figure S2. SEM of (a) $\text{Fe}_3\text{S}_4$ , (b) $\text{Fe}_3\text{S}_4\text{-CTAB}_{0.25}$ , (c) $\text{Fe}_3\text{S}_4\text{-CTAB}_{0.50}$ , (d) $\text{Fe}_3\text{S}_4\text{-CTAB}_{0.75}$  and (e) $\text{Fe}_3\text{S}_4\text{-CTAB}_{1.00}$

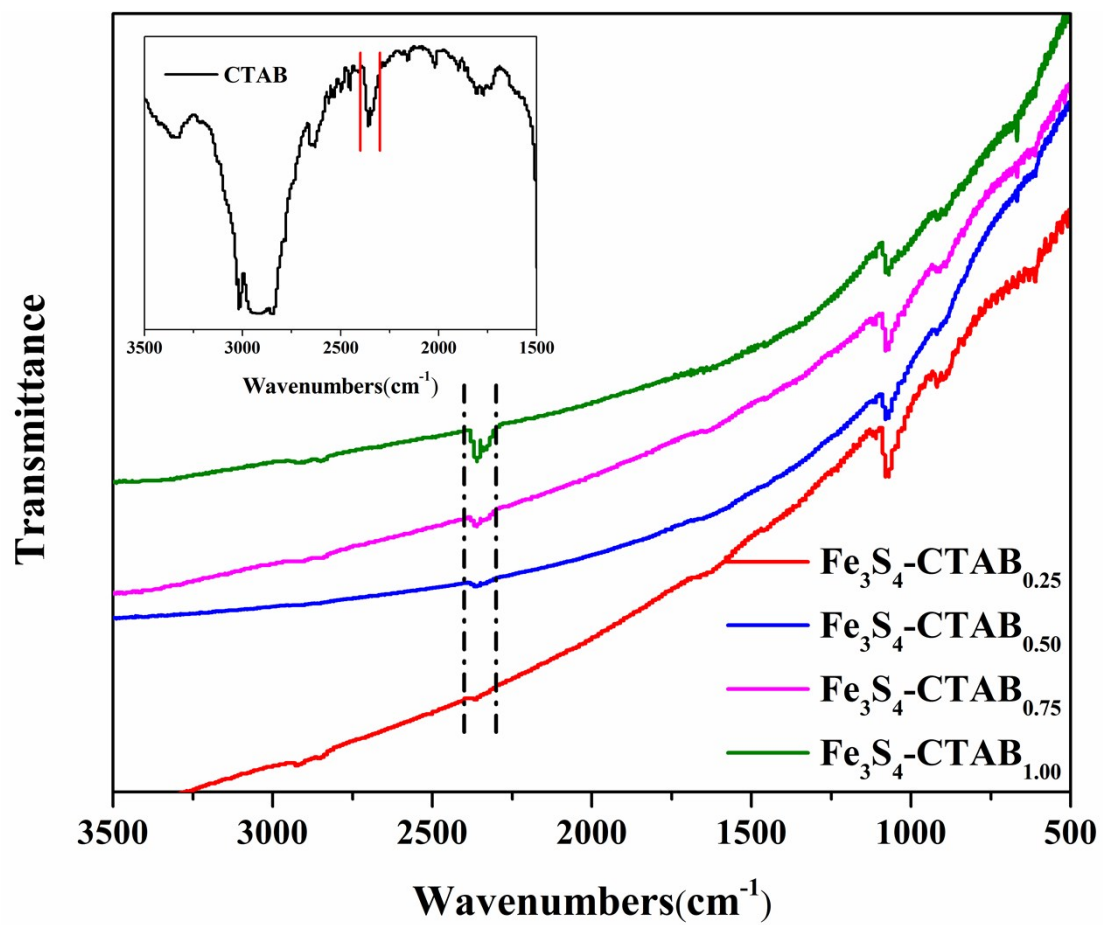

Figure S3. FTIR spectra of  $\text{Fe}_3\text{S}_4$ -CTAB<sub>0.25</sub>,  $\text{Fe}_3\text{S}_4$ -CTAB<sub>0.50</sub>,  $\text{Fe}_3\text{S}_4$ -CTAB<sub>0.75</sub>,  $\text{Fe}_3\text{S}_4$ -CTAB<sub>1.00</sub>

and

pure

CTAB

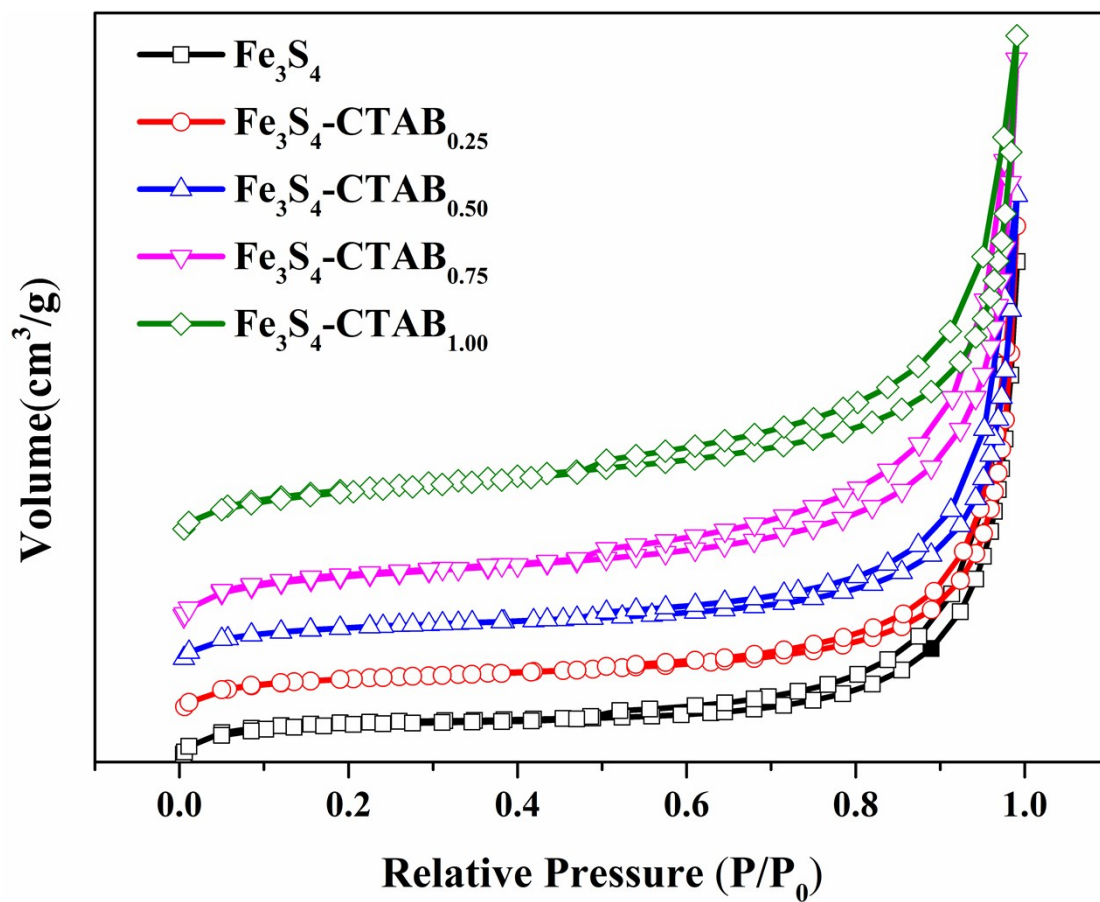

Figure S4. N<sub>2</sub> adsorption-desorption isotherm of Fe<sub>3</sub>S<sub>4</sub>, Fe<sub>3</sub>S<sub>4</sub>-CTAB<sub>0.25</sub>, Fe<sub>3</sub>S<sub>4</sub>-CTAB<sub>0.50</sub>, Fe<sub>3</sub>S<sub>4</sub>-CTAB<sub>0.75</sub> and Fe<sub>3</sub>S<sub>4</sub>-CTAB<sub>1.00</sub>

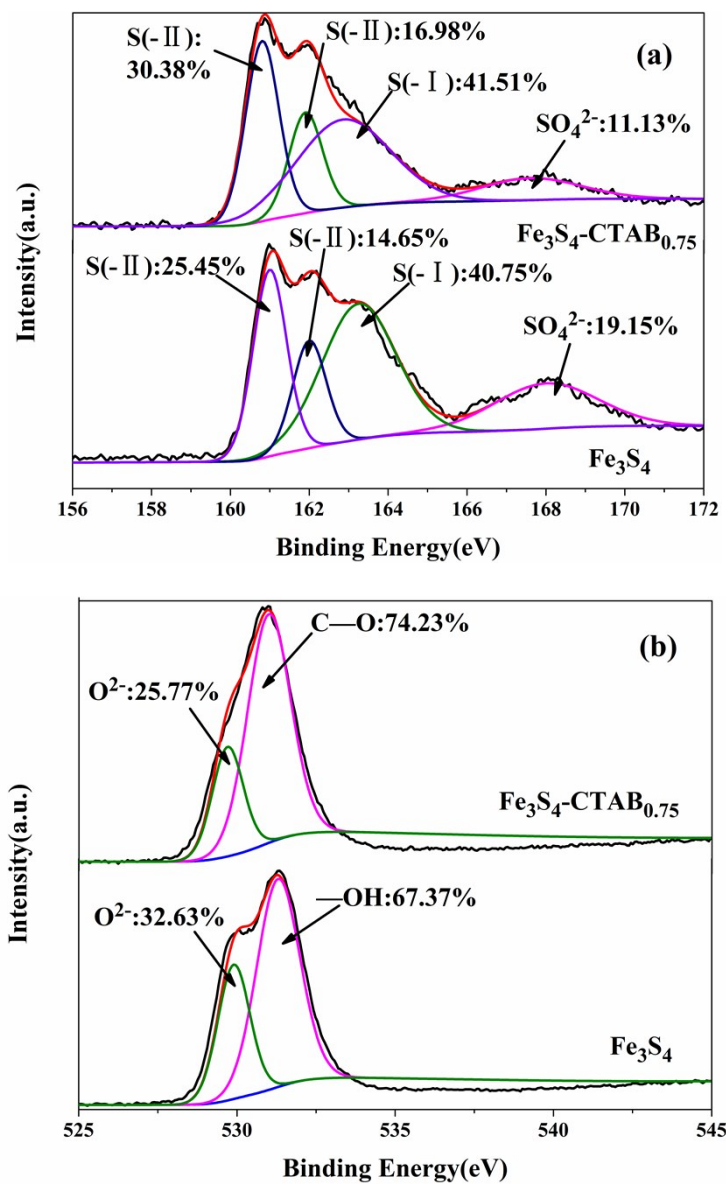

Figure S5. XPS spectra of (a) the S 2p region and (b) the O 1s region of  $\text{Fe}_3\text{S}_4$  and  $\text{Fe}_3\text{S}_4\text{-CTAB}_{0.75}$  sample.



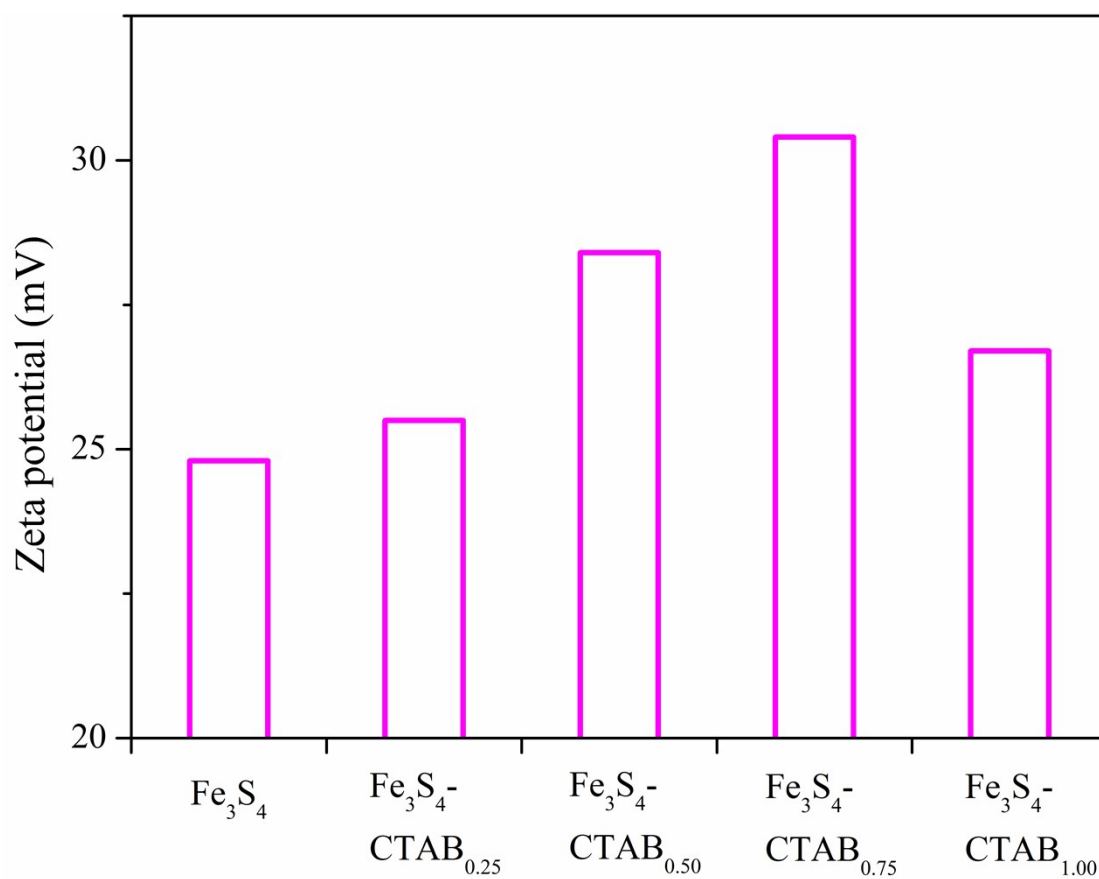

Figure S6. Zeta potentials of  $\text{Fe}_3\text{S}_4$ ,  $\text{Fe}_3\text{S}_4\text{-CTAB}_{0.25}$ ,  $\text{Fe}_3\text{S}_4\text{-CTAB}_{0.50}$ ,  $\text{Fe}_3\text{S}_4\text{-CTAB}_{0.75}$  and  $\text{Fe}_3\text{S}_4\text{-CTAB}_{1.00}$  in deionized water (pH=2.0).

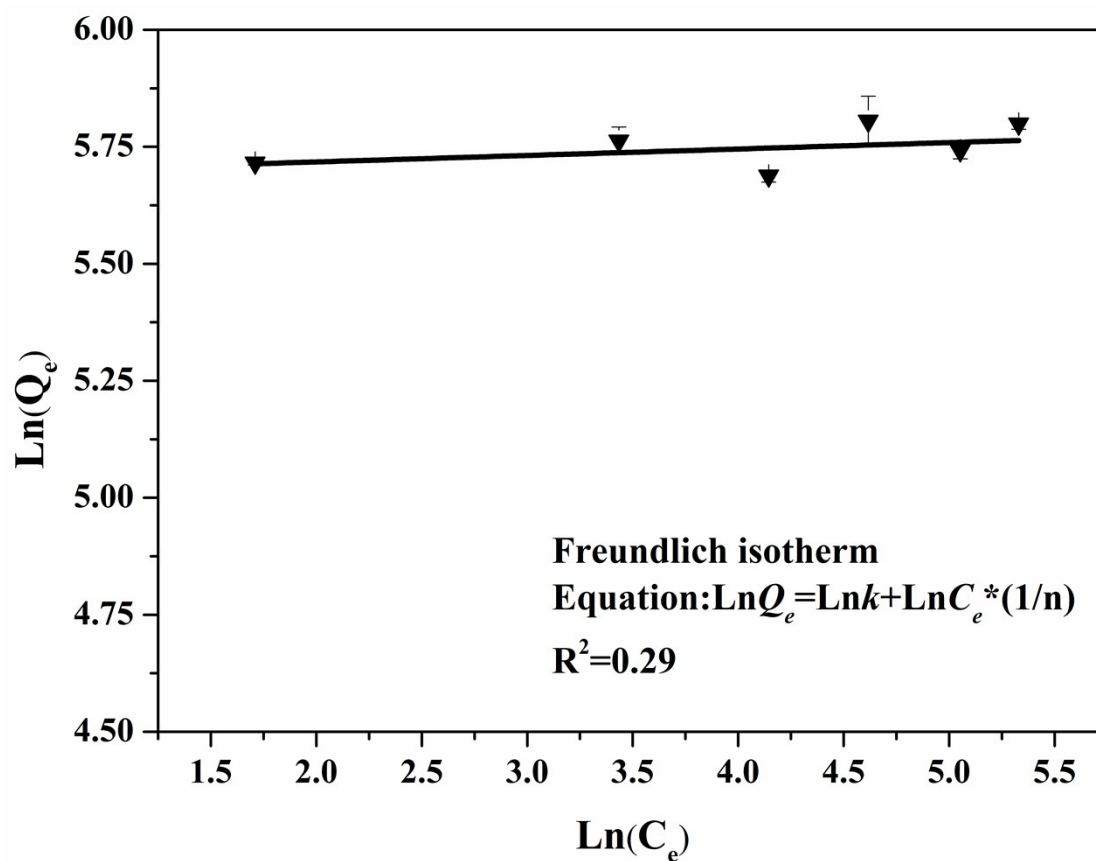

Figure S7. Freundlich isotherm of Cr(VI) adsorption. The reactions were carried out at initial Cr(VI) concentrations of of 100-300 mg·L<sup>-1</sup> with 0.3 g·L<sup>-1</sup> Fe<sub>3</sub>S<sub>4</sub>-CTAB<sub>0.75</sub>, with pH<sub>0</sub>=2.0.

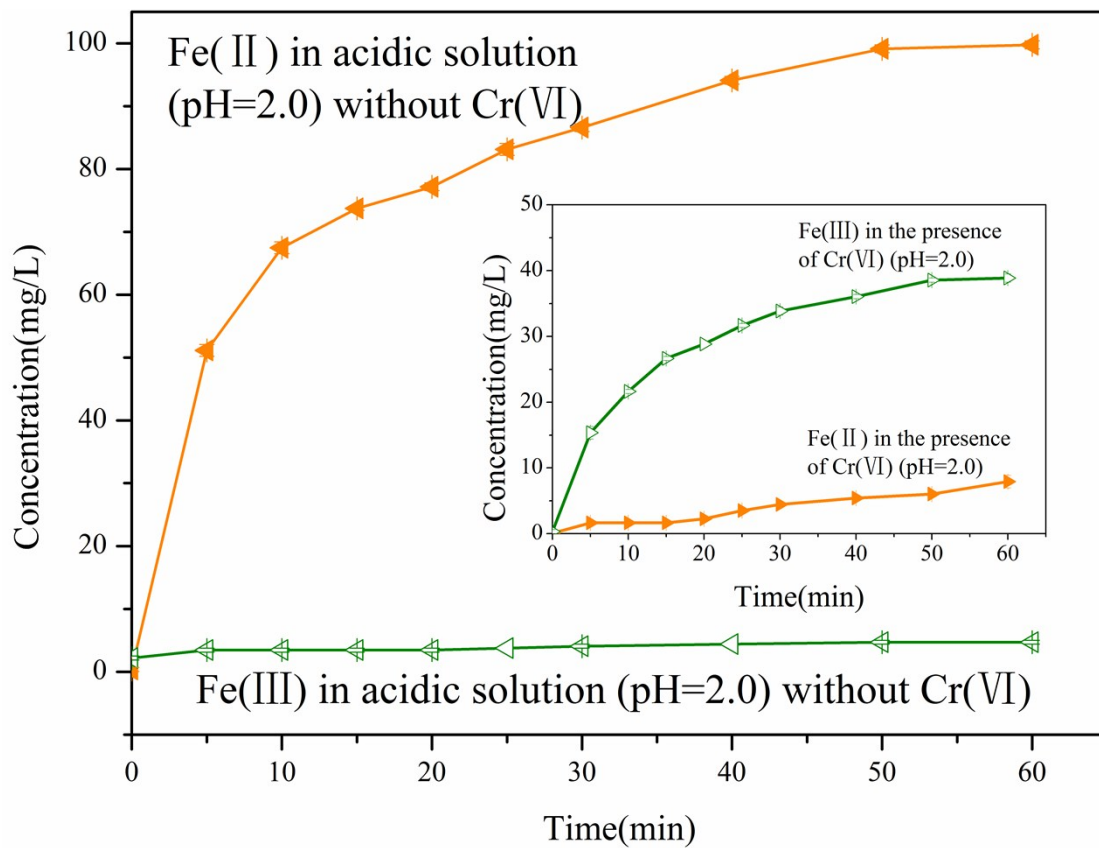

Figure S8. Release of dissolved Fe(II) and Fe(III) from  $\text{Fe}_3\text{S}_4\text{-CTAB}_{0.75}$  in acidic solution (pH=2.0) without Cr(VI) and in the presence of Cr(VI) (pH=2.0).

Table S1 XPS results based on curve fitting for Fe 2p, S 2p, and Cr 2p peaks before and after the reaction.

| Elements |        | Species                            | Relative fraction (%) |
|----------|--------|------------------------------------|-----------------------|
| Fe       | Before | Fe(II) and Fe <sup>0</sup>         | 59.84                 |
|          |        | Fe(III)                            | 40.16                 |
|          | After  | Fe(II)                             | 49.85                 |
|          |        | Fe(III)                            | 50.15                 |
| S        | Before | S(- II)                            | 47.36                 |
|          |        | S(- I )                            | 41.51                 |
|          |        | S(VI)                              | 11.13                 |
|          | After  | S(- II)                            | 24.25                 |
|          |        | S <sub>n</sub> <sup>2-</sup> (n>2) | 48.17                 |
|          |        | S(VI)                              | 27.57                 |
| Cr       | After  | Cr <sub>2</sub> O <sub>3</sub>     | 23.23                 |
|          |        | Cr(OH) <sub>3</sub>                | 40.72                 |
|          |        | Cr(III)-containing material        | 36.05                 |

Table S2 Pseudo-first-order reaction kinetics for Cr(VI) removal by sorbents

| Synthesis                                  | Kinetic constant, $k$ ( $10^{-2} \text{ min}^{-1}$ ) | Coefficient of determination, $R^2$ |
|--------------------------------------------|------------------------------------------------------|-------------------------------------|
| $\text{Fe}_3\text{S}_4$                    | 1.380                                                | 0.887                               |
| $\text{Fe}_3\text{S}_4\text{-CTAB}_{0.25}$ | 1.867                                                | 0.953                               |
| $\text{Fe}_3\text{S}_4\text{-CTAB}_{0.50}$ | 3.503                                                | 0.953                               |
| $\text{Fe}_3\text{S}_4\text{-CTAB}_{0.75}$ | 4.454                                                | 0.988                               |
| $\text{Fe}_3\text{S}_4\text{-CTAB}_{1.00}$ | 3.150                                                | 0.978                               |
